# Supplementary material for: Protocol for scoping review study to map out the existing research in relation to post-traumatic stress symptoms among caregivers of individuals with neurodevelopmental, psychiatric and neurocognitive disorders
Source: HighWire-hosted journal article supplement (doi:10.1136/bmjopen-2021-058118), 2022-11-01
Supplement: bmjopen-2021-058118supp002_data_supplement.pdf [file bmjopen-2021-058118supp002_data_supplement.pdf]

## Caregiver PTSS Abstract Screening Tool

| To Screen In Article<br>A “yes” or “unsure” to all of the following:                                                                                                                                                                                                                                                                                                                                                                                                                                                                                            | To Screen Out Article<br>A “no” to any of the following: |
|-----------------------------------------------------------------------------------------------------------------------------------------------------------------------------------------------------------------------------------------------------------------------------------------------------------------------------------------------------------------------------------------------------------------------------------------------------------------------------------------------------------------------------------------------------------------|----------------------------------------------------------|
| 1. Title and abstract is written in the English language.                                                                                                                                                                                                                                                                                                                                                                                                                                                                                                       |                                                          |
| 2. Population <ul style="list-style-type: none"> <li>- Participants of the study involve caregivers who provide care to individuals with neurodevelopmental, psychiatric or neurocognitive disorders.</li> <li>- <b>Note</b></li> <li>- Caregivers <u>include</u> informal caregivers, that includes parents and family members; <u>exclude</u> caregivers that are professionals / paid caregivers</li> </ul>                                                                                                                                                  |                                                          |
| 3. Concept / Interest <ul style="list-style-type: none"> <li>- The article explores / investigates / examine posttraumatic stress symptoms, trauma symptoms, or PTSD, in these caregivers.</li> <li>- The article reports qualitative or quantitative primary data about posttraumatic stress symptoms (PTSS), trauma symptoms, and PTSD in these caregivers</li> <li>- <b>Note</b></li> <li>- This excludes articles that review secondary data from other research related to PTSS, trauma symptoms or PTSD or post-traumatic growth in caregivers</li> </ul> |                                                          |
| 4. Context (to include in Full text screening tool) <ul style="list-style-type: none"> <li>- Caregivers must be providing caregiving to individuals with neurocognitive, psychiatric or neurodevelopmental disorders.</li> <li>- <b>Note</b></li> <li>- This excludes providing caregiving to individuals with medical illnesses, or premature infants.</li> </ul>                                                                                                                                                                                              |                                                          |

## Guide on Screening Terms in Articles:

| Likely to be Relevant                                                                                                                                                                                                                                                                                                                                                                                                                                                                                                                                                                                                                  | Unlikely to be Relevant                                                                                                                                                                                                                                                                                                                                                                                                                                                                                                                                                                                         |
|----------------------------------------------------------------------------------------------------------------------------------------------------------------------------------------------------------------------------------------------------------------------------------------------------------------------------------------------------------------------------------------------------------------------------------------------------------------------------------------------------------------------------------------------------------------------------------------------------------------------------------------|-----------------------------------------------------------------------------------------------------------------------------------------------------------------------------------------------------------------------------------------------------------------------------------------------------------------------------------------------------------------------------------------------------------------------------------------------------------------------------------------------------------------------------------------------------------------------------------------------------------------|
| <ul style="list-style-type: none"> <li>- Caregivers of patients / children / adults with neurodevelopmental, psychiatric and neurocognitive disorders</li> <li>- PTSS / PTSD / Trauma symptoms / traumatic experiences</li> <li>- Aggressive behaviours</li> <li>- Challenging behaviours</li> <li>- Behaviour problems</li> <li>- Violence / violent behaviours</li> <li>- Aggression</li> <li>- Neurodevelopmental disorders</li> <li>- Developmental disabilities</li> <li>- Intellectual disability</li> <li>- Autism</li> <li>- Psychosis</li> <li>- Schizophrenia</li> <li>- Personality disorder</li> <li>- Dementia</li> </ul> | <p>Participants</p> <ul style="list-style-type: none"> <li>- Patients / children / adults with PTSD / trauma</li> <li>- Patients / children / adults with chronic / acute medical illness</li> <li>- Patients / children / adults with cancer</li> <li>- Patients / children / adults with Motor vehicle accident</li> </ul> <p>Context</p> <ul style="list-style-type: none"> <li>- Physical / sexual abuse</li> <li>- Partner violence</li> </ul> <p>Types of articles</p> <ul style="list-style-type: none"> <li>- Commentaries or opinion articles that do not include primary or secondary data</li> </ul> |
